# Supplementary material for: How and How Much Molecular Conformation Affects Electronic Circular Dichroism: The Case of 1,1-Diarylcarbinols
Source: PubMed Central journal article supplement (PMC6017593; doi:10.3390/molecules23010128), 2018-01-09
Supplement: molecules-23-00128-s001.pdf [file molecules-23-00128-s001.pdf]

# Supplementary Material: How and How Much Molecular Conformation Affects Electronic Circular Dichroism: the Case of 1,1-Diarylcannabinols

Daniele Padula and Gennaro Pescitelli

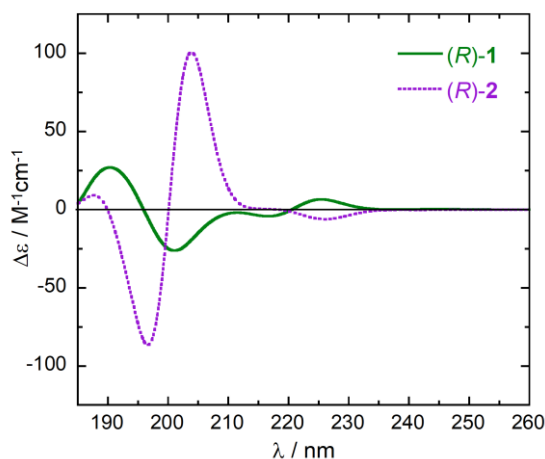

**Figure S1.** Calculated weighted-average ECD spectra of (R)-1 and (R)-2 at  $\omega$ B97X-D/def2-TZVP/PCM level. Spectra plotted as sums of Gaussians with 0.15 eV exponential band-width and shifted by +15 nm.

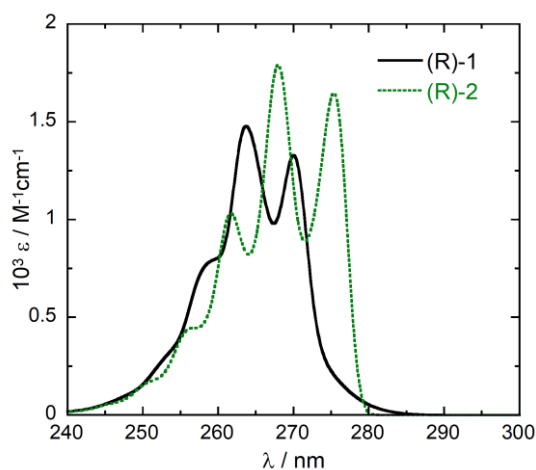

**Figure S2.** Calculated weighted-average vibronic absorption spectra of (R)-1 and (R)-2 in the  ${}^1L_b$  region. Calculated spectra plotted as sums of Gaussians with 0.025 eV exponential band-width, shifted by +30 nm.

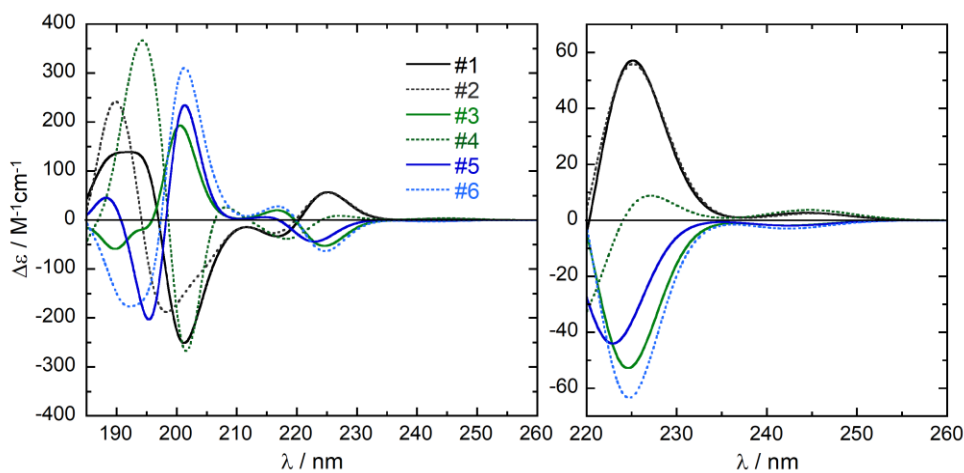

**Figure S3.** Calculated ECD spectra for conformers #1-#6 of (*R*)-**1** at  $\omega$ B97X-D/def2-TZVP/PCM level in the 195-260 nm range. The plots on the right show an expansion of the  $^1L_a/{}^1L_b$  region. Spectra plotted as sums of Gaussians with 0.15 eV exponential band-width and shifted by +15 nm.

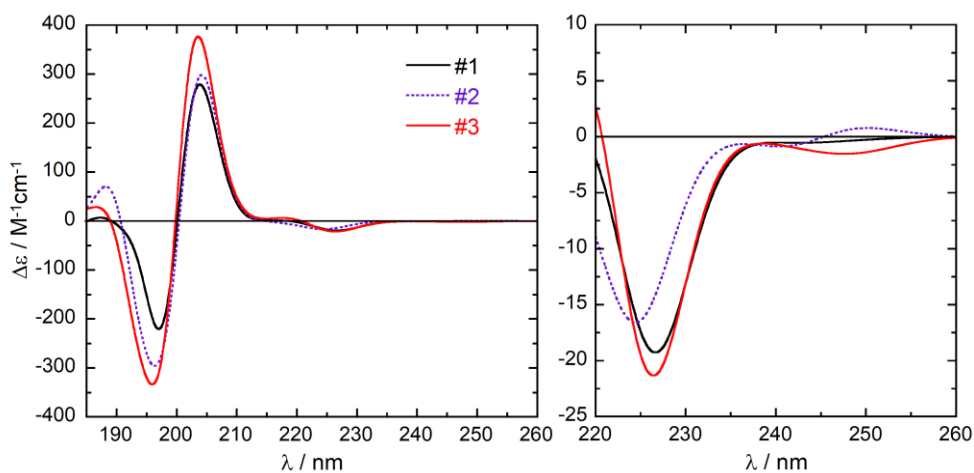

**Figure S4.** Calculated ECD spectra for conformers #1-#3 of (*R*)-**2** at  $\omega$ B97X-D/def2-TZVP/PCM level. The plots on the right show an expansion of the  $^1L_a/{}^1L_b$  region. Spectra plotted as sums of Gaussians with 0.15 eV exponential band-width and shifted by +15 nm.
